# Supplementary material for: A zinc-based metal–organic framework with a triazine moiety: effective detection of antibiotics and photodegradation dyes in aqueous solution
Source: Royal Society of Chemistry journal article supplement (doi:10.1039/d2ce01684b), 2023-01-01
Supplement: d2ce01684b1.pdf [file d2ce01684b1.pdf]

## Supporting Information

### **A zinc-based metal-organic framework with triazine moiety: effective detection of antibiotics and photodegradation dyes in aqueous solutions**

**Xueyi Chen<sup>a, b 1</sup>, Geng Tan<sup>b 1</sup>, Wanyu Chen<sup>b</sup>, Jiaming Chang<sup>b</sup>, Yuanmeng Yue<sup>b</sup>, Yameng Li<sup>b</sup>, Ng Seik  
Weng<sup>c</sup>, Lilei Zhang<sup>b, \*</sup>, Xun Feng<sup>b, \*</sup>**

<sup>a</sup> College of Chemistry, Zhengzhou University, Zhengzhou, 450001, China.

<sup>b</sup> College of Chemistry, Luoyang Normal University, Luoyang, 471934, China.

<sup>c</sup> Institute of Postgraduate Studies and Research, University of Malaya, 50603 Kuala Lumpur, Malaysia

Email: [fengx@lynu.edu.cn](mailto:fengx@lynu.edu.cn)

Email: [zhanglilei@outlook.com](mailto:zhanglilei@outlook.com)

\* Corresponding authors.

<sup>1</sup> These authors contributed equally.

---

## Experimental Section

### Physical measurements

Elemental analysis of C, H and N atoms was carried out on a Elementar Vario EL analyzer. The infrared spectra (IR) were acquired by using a thermo scientific nicole 6700 FT-IR spectrometer from 4000 to 500  $\text{cm}^{-1}$  were registered on Avatar 360 E.S.P. using KBr pellets. The powder X-ray diffraction (PXRD) patterns of the samples were obtained using a Bruker D8 Advance powder diffractometer at 40 kV and 40 mA using Cu-K $\alpha$  radiation ( $\lambda = 1.5418 \text{ \AA}$ ), with a scan rate of 0.2 s per step and a step size of 0.02 ( $2\theta$ ). Simulation of PXRD spectra with single crystal data and diffraction crystal module of Mercury program. The thermal stability of the samples was performed on a NETZSCH STA 449 C system under a heating rate of 10  $^{\circ}\text{C}/\text{min}$  from 30 to 800  $^{\circ}\text{C}$  at  $\text{N}_2$  atmosphere.

### X-ray Crystallography

The single-crystal X-ray diffraction analysis of **1-Zn** was carried out on a Rigaku supernova CCD system. Confocal monochromatic Mo K $\alpha$  radiation ( $\lambda = 0.71073 \text{ \AA}$ ). Crystal structures were solution by SHELXS-2014 and least squares refinement by SHELXL-2014. The non-hydrogen atoms were refined with anisotropic thermal mobility coefficients. All hydrogen atoms are positioned at geometrically ideal locations and refined using the riding method. The crystallographic data for **1-Zn** are listed in Table S1. Some bond lengths and bond angles are given in Table S2.

### Determination of reactive species

In order to identify the main active species, quenching experiments were performed by introducing different scavengers in the photocatalytic system, where benzoquinone (BQ, 0.2  $\text{mmol L}^{-1}$ ), isopropyl alcohol (IPA, 0.2  $\text{mmol L}^{-1}$ ) and ethylenediaminetetraacetic acid disodium salt (EDTA-2Na, 0.2  $\text{mmol L}^{-1}$ ) were used as quenchers for  $\cdot\text{O}_2^-$ ,  $\cdot\text{OH}$  and  $\text{h}^+$  species.<sup>1,2</sup> The electron spin resonance (ESR) spectra of  $\cdot\text{OH}$  and  $\cdot\text{O}_2^-$  were registered on an electron paramagnetic resonance spectrometer (EMX-Plus, Bruker) using 5,5-dimethylpyrroline N-oxide (DMPO) as a sacrificial agent.

### Photocatalytic activity

The photocatalytic properties of complex **1-Zn** were investigated by simulating visible light degradation of dyes under a 300 W xenon lamp with a 420 nm filter. Before light exposure, 50 mg of the photocatalyst powder was mixed in 50 ml of an aqueous solution containing Rh B and MB (10  $\text{ppm L}^{-1}$ ). At the same time, the suspension was stirred continuously for 60 min in the absence of visible light to arrive at an adsorption-desorption equilibrium. Furthermore, the photocatalytic decomposition efficiency was

---

analyzed through their characteristic absorption peaks at 554 nm for Rh B and 644 nm for MB. Then, all samples were exposed to visible light and taken out of the reaction solution (3 ml) every 5 min, separated the supernatant with a centrifuge at 5000 rpm, and collected for UV analysis last. Comparative experiments were carried out without **1-Zn** under the above conditions.

**Table. S1** Crystallographic data and structure refinements for **1-Zn**.

| Sample                                                                                                                                                                                                                                                                  | <b>1-Zn</b>                                                                                   |
|-------------------------------------------------------------------------------------------------------------------------------------------------------------------------------------------------------------------------------------------------------------------------|-----------------------------------------------------------------------------------------------|
| Formula                                                                                                                                                                                                                                                                 | C <sub>48</sub> H <sub>28</sub> N <sub>6</sub> O <sub>14</sub> S <sub>6</sub> Zn <sub>3</sub> |
| CCDC                                                                                                                                                                                                                                                                    | 2214180                                                                                       |
| Formula weight                                                                                                                                                                                                                                                          | 1301.23                                                                                       |
| Space group                                                                                                                                                                                                                                                             | P2(1)/c                                                                                       |
| Crystal system                                                                                                                                                                                                                                                          | Monoclinic                                                                                    |
| a / Å                                                                                                                                                                                                                                                                   | 4.7442(2)                                                                                     |
| b / Å                                                                                                                                                                                                                                                                   | 31.8938(10)                                                                                   |
| c / Å                                                                                                                                                                                                                                                                   | 15.6270(6)                                                                                    |
| α / deg                                                                                                                                                                                                                                                                 | 90                                                                                            |
| β / deg                                                                                                                                                                                                                                                                 | 95.026(3)                                                                                     |
| γ / deg                                                                                                                                                                                                                                                                 | 90                                                                                            |
| V / Å <sup>3</sup>                                                                                                                                                                                                                                                      | 2355.44(15)                                                                                   |
| Z                                                                                                                                                                                                                                                                       | 2                                                                                             |
| D <sub>calc</sub> (g cm <sup>-3</sup> )                                                                                                                                                                                                                                 | 1.835                                                                                         |
| μ / mm <sup>-1</sup>                                                                                                                                                                                                                                                    | 1.861                                                                                         |
| Reflections collected                                                                                                                                                                                                                                                   | 9660                                                                                          |
| Independent reflections                                                                                                                                                                                                                                                 | 5138                                                                                          |
| R(int)                                                                                                                                                                                                                                                                  | 0.0257                                                                                        |
| F (000)                                                                                                                                                                                                                                                                 | 1312                                                                                          |
| GOF on F <sup>2</sup>                                                                                                                                                                                                                                                   | 1.031                                                                                         |
| R <sub>1</sub> <sup>a</sup> [I > 2σ(I)]                                                                                                                                                                                                                                 | 0.0647                                                                                        |
| wR <sub>2</sub> <sup>b</sup> (all data)                                                                                                                                                                                                                                 | 0.1643                                                                                        |
| <sup>a</sup> R <sub>1</sub> = Σ  F <sub>o</sub>   -  F <sub>c</sub>   /Σ F <sub>o</sub>  . <sup>b</sup> wR <sub>2</sub> = [Σw (F <sub>o</sub> <sup>2</sup> - F <sub>c</sub> <sup>2</sup> ) <sup>2</sup> /Σw(F <sub>o</sub> <sup>2</sup> ) <sup>2</sup> ] <sup>1/2</sup> |                                                                                               |

**Table. S2.** Selected bond lengths (Å) and angles (°) for **1-Zn**.

|               |            |               |            |
|---------------|------------|---------------|------------|
| Zn1-O1        | 1.943(4)   | Zn2-O3        | 1.853(5)   |
| Zn1-O6#1      | 1.963(3)   | Zn2-O2w       | 1.985(10)  |
| Zn1-O5#2      | 1.967(3)   | Zn2-O1w       | 2.095(14)  |
| Zn1-O4#3      | 1.971(3)   | Zn2-O2        | 2.198(5)   |
| O1-Zn1-O6#1   | 103.19(16) | O1-Zn1-O5#2   | 110.07(16) |
| O6#1-Zn1-O5#2 | 105.13(13) | O1-Zn1-O4#3   | 140.34(16) |
| O6#1-Zn1-O4#3 | 97.88(14)  | O5#2-Zn1-O4#3 | 96.02(14)  |
| O3-Zn2-O2w    | 145.9(4)   | O3-Zn2-O1w    | 87.3(4)    |
| O2w-Zn2-O1w   | 85.5(5)    | O3-Zn2-O2     | 101.1(2)   |
| O2w-Zn2-O2    | 83.5(4)    | O1w-Zn2-O2    | 168.9(4)   |

**Table. S3.** HOMO and LUMO energies calculated for selected analytes and 1-Eu used at B3LYP/6-31G\*level.

| <b>Analytes</b> | <b>HOMO (eV)</b> | <b>LUMO (eV)</b> | <b>Band Gap (eV)</b> | <b>Ref.</b> |
|-----------------|------------------|------------------|----------------------|-------------|
| ENR             | -6.264           | -1.837           | 4.427                | 3           |
| CIP             | -6.274           | -1.841           | 4.433                | 3           |
| NOR             | -6.450           | -2.020           | 4.430                | 3           |
| MDZ             | -7.307           | -2.835           | 4.472                | 4           |
| TCH             | -6.200           | -3.860           | 2.340                | 4           |
| <b>1-Zn</b>     | -6.775           | -2.609           | 4.166                | This work   |

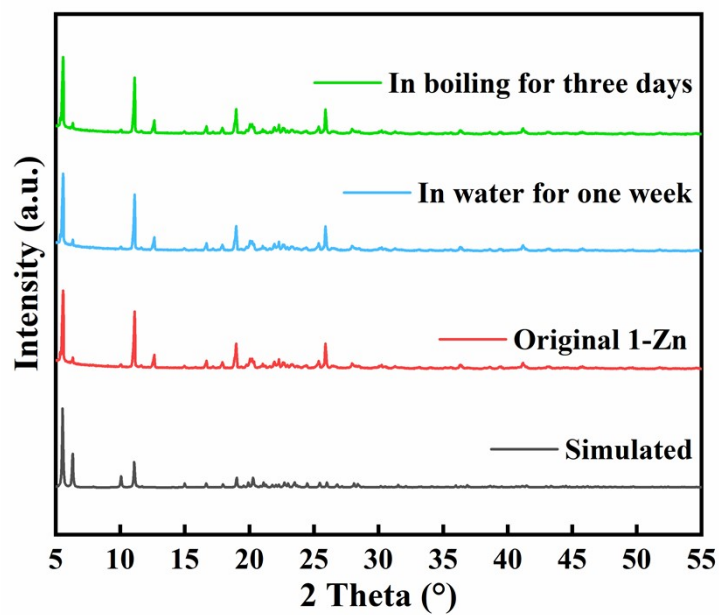

**Fig. S1** The PXR D patterns of 1-Zn.

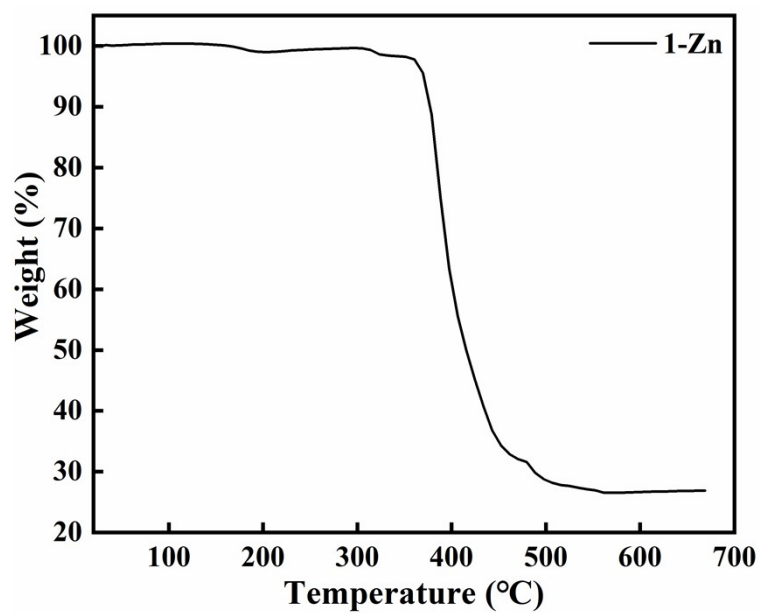

**Fig. S2** Thermogravimetric analysis of 1-Zn.

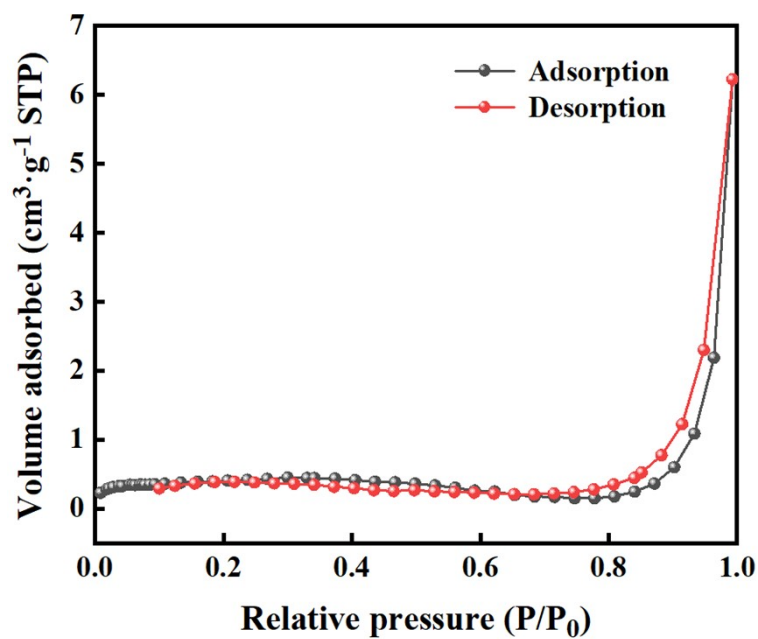

Fig. S3  $\text{N}_2$  adsorption isotherm of 1-Zn at 77 K.

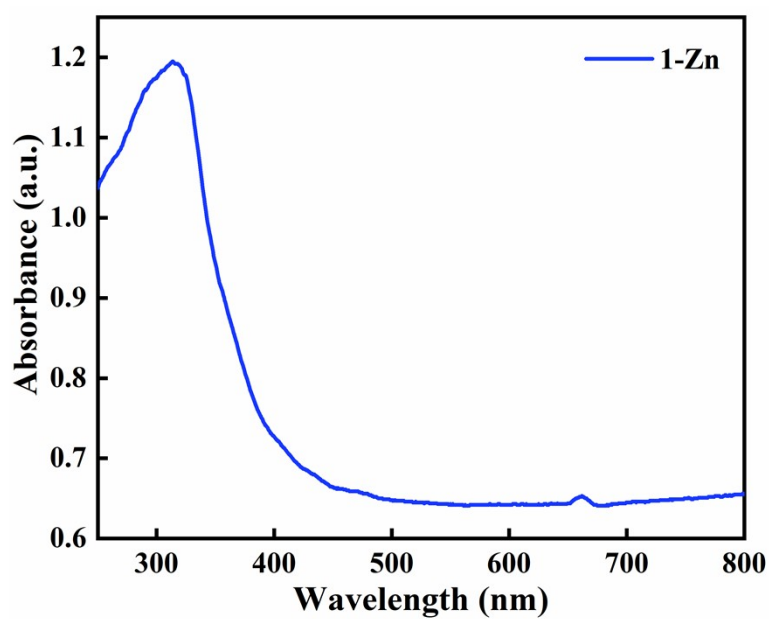

Fig. S4 UV-Vis adsorption spectrum of 1-Zn.

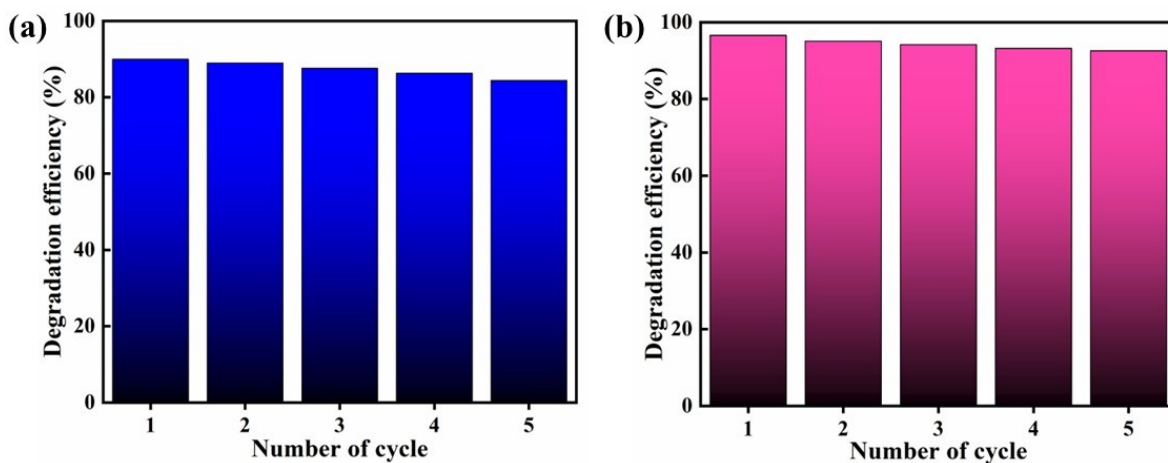

Fig. S5 The recycling performance of 1-Zn for (a) Rh B and (b) MB.

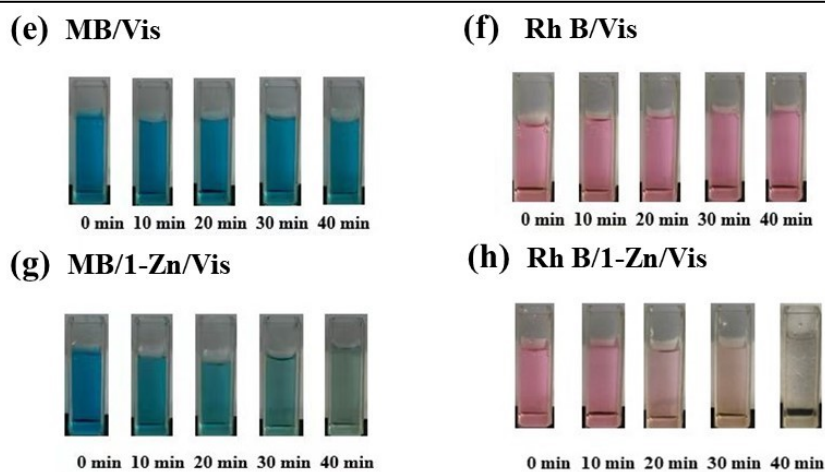

**Fig. S6** Comparison of photocatalytic activity under different experimental environments.

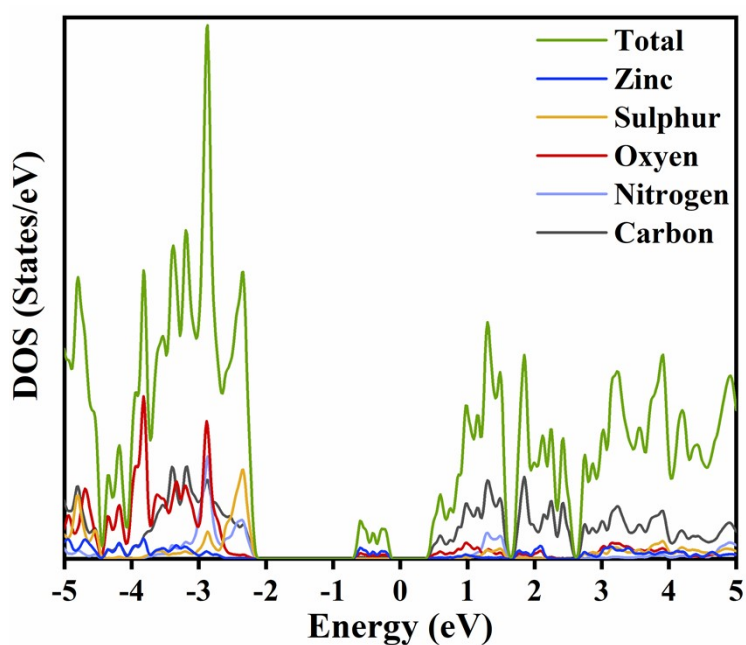

**Fig. S7** The DOS and partial DOS plots for 1-Zn.

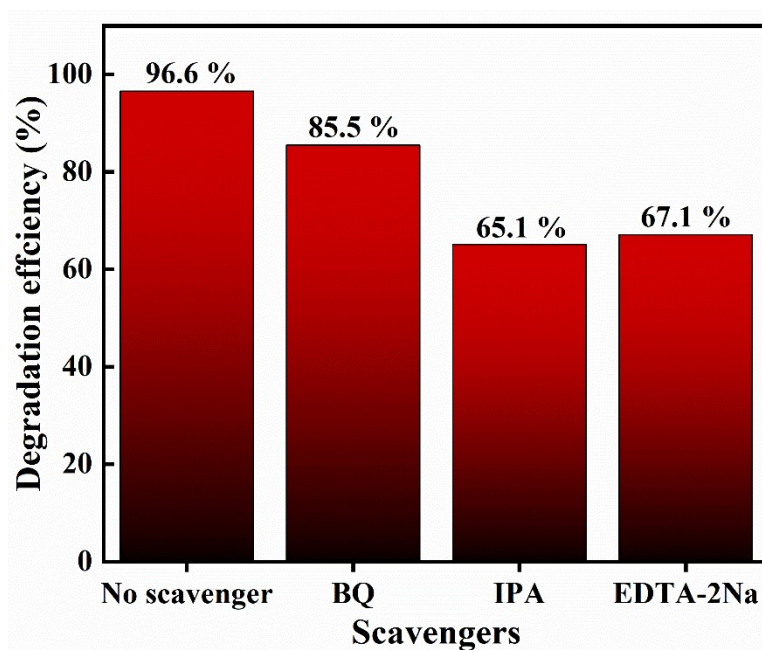

**Fig. S8** Photocatalytic degradation of Rh B with the addition of different scavengers.



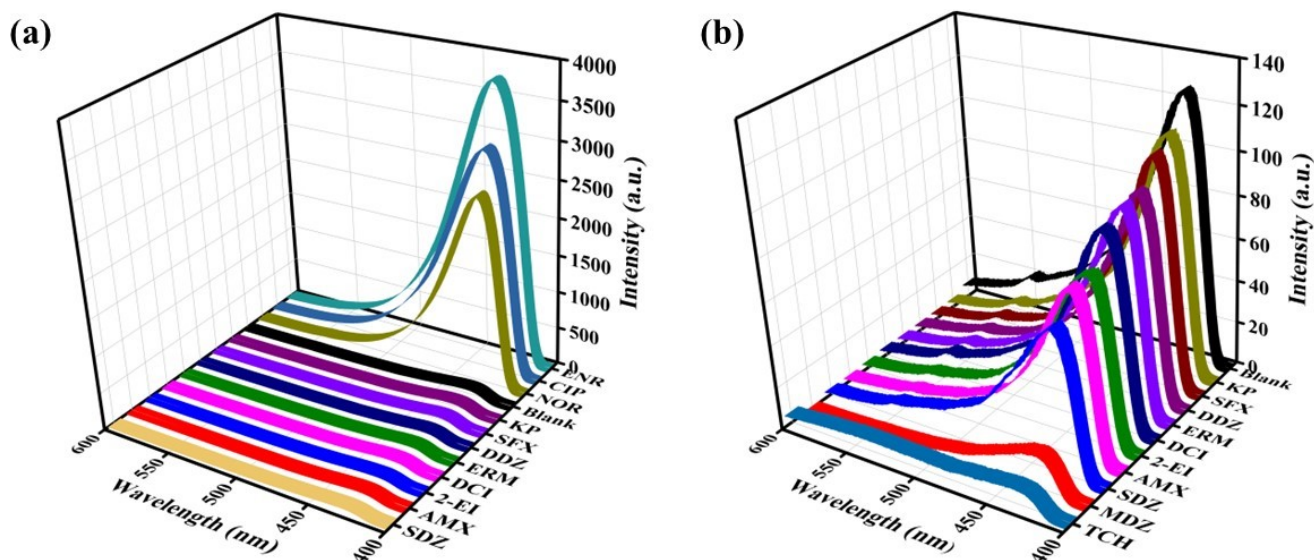

**Fig. S9** Complex 1-Zn detection of (a) fluorescence-enhanced and (b) fluorescence-diminished luminescence spectra.

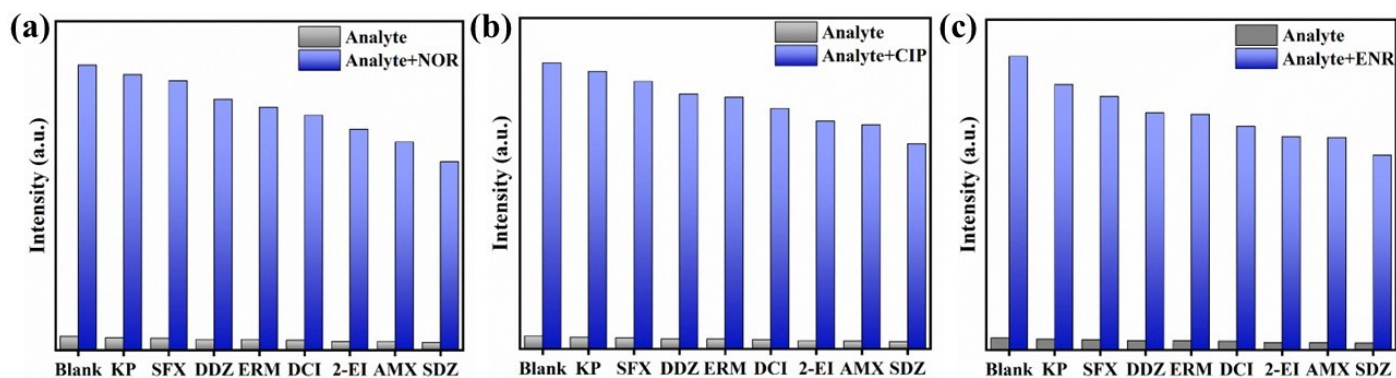

**Fig. S10** the luminescent intensity of 1-Zn dispersed in (a) NOR, (c) CIP, and (d) ENR with other competing antibiotics ( $10^{-4}$  mol L $^{-1}$ ).

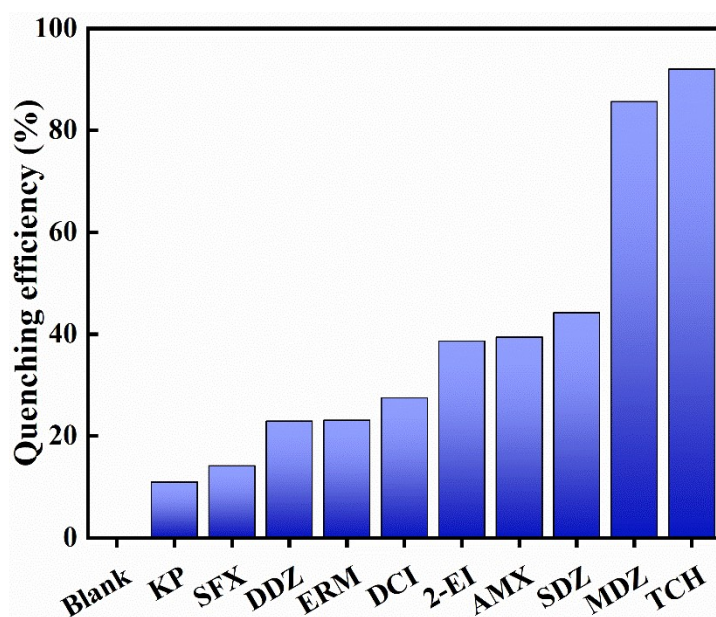

**Fig. S11** Quenching efficiency of 1-Zn in  $10^{-4}$  mol L $^{-1}$  of different antibiotics.

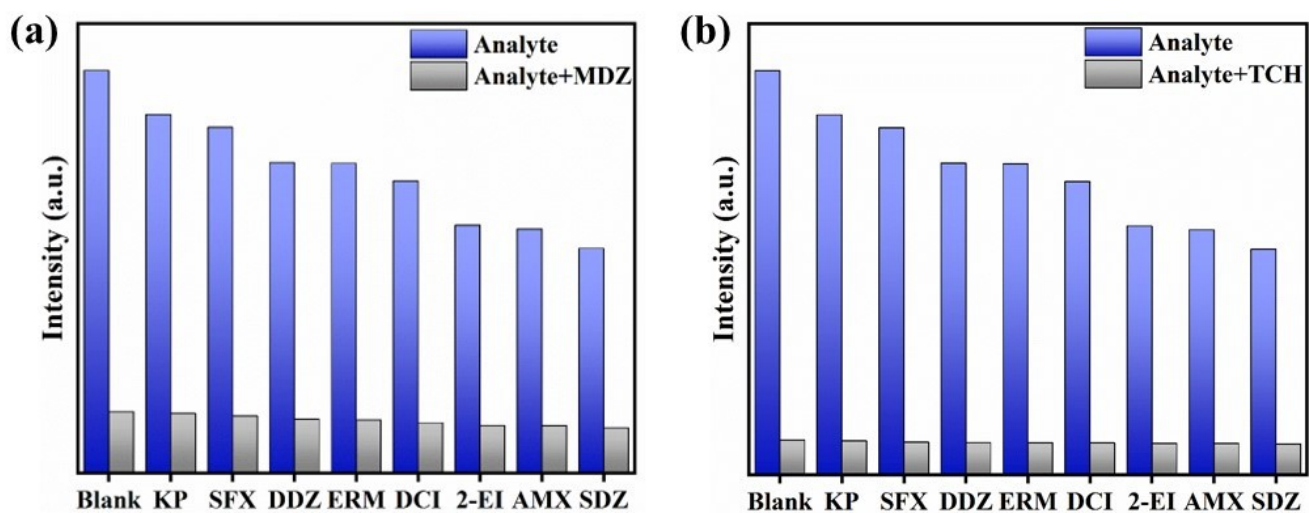

**Fig. S12** the luminescent intensity of **1-Zn** dispersed in (a) MDZ and (b) TCH with other competing antibiotics ( $10^{-4}$  mol  $L^{-1}$ ).

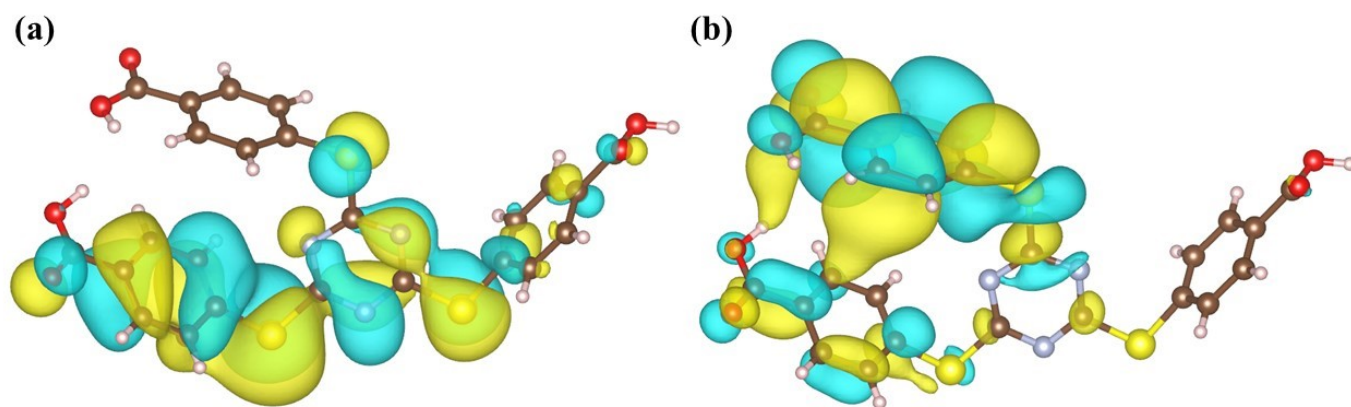

**Fig. S13** The (a) LUMO and (b) HOMO level of **1-Zn**.

---

## References

- (1) G. Tan, R.-Q. Jia, X. Zhao, Y.-Q. Guo, L.-L. Zhang, X.-H. Wang, J.-G. Wang, X. Feng, B. Li and L.-Y. Wang, *J. I. C. Inorg. Chem.*, 2022, **61**, 11866–11878.
- (2) D. Wang, F. Jia, H. Wang, F. Chen, Y. Fang, W. Dong, G. Zeng, X. Li, Q. Yang and X. Yuan, *J. Colloid. Interface. Sci.*, 2018, **519**, 273-284.
- (3) W.-B. Zhong, R.-X. Li, J. Lv, T. He, M.-M. Xu, B. Wang, L.-H. Xie and J.-R. Li, *J. I. C. F. Inorg. Chem. Front.*, 2020, **7 (5)**, 1161-1171.
- (4) S. Kumar and H. S. Karthikeyan, *J. Mater. Environ. Sci.*, 2013, **4 (5)**, 675-984.
